RESEARCH ARTICLE

# PDGF-AA Promotes Osteogenic Differentiation and Migration of Mesenchymal Stem Cell by Down-Regulating PDGFR $\alpha$ and Derepressing BMP-Smad1/5/8 Signaling

Anna Li<sup>1,2</sup>, Xuechun Xia<sup>2</sup>, James Yeh<sup>2</sup>, Huiyi Kua<sup>3</sup>, Huijuan Liu<sup>2</sup>, Yuji Mishina<sup>4</sup>, Aijun Hao<sup>1\*</sup>, Baojie Li<sup>2\*</sup>

1. Department of Histology and Embryology, Shandong University School of Medicine, 44 Wenhua Xi Road, Jinan, Shandong, 250012 P.R. China, 2. The Bio-X Institutes, Key Laboratory for the Genetics of Developmental and Neuropsychiatric Disorders, Ministry of Education, Shanghai Jiao Tong University, Shanghai 200030, China, 3. The Institute of Molecular and Cell Biology, Agency for Science, Technology, and Research, Singapore 138632, Singapore, 4. Department of Biologic and Materials Sciences, School of Dentistry, University of Michigan, Ann Arbor, Michigan, United States of America

\*[libj@sju.edu.cn](mailto:libj@sju.edu.cn) (BL); [aijunhao@sdu.edu.cn](mailto:aijunhao@sdu.edu.cn) (AH)

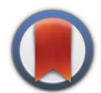

CrossMark  
click for updates

**OPEN ACCESS**

**Citation:** Li A, Xia X, Yeh J, Kua H, Liu H, et al. (2014) PDGF-AA Promotes Osteogenic Differentiation and Migration of Mesenchymal Stem Cell by Down-Regulating PDGFR $\alpha$  and Derepressing BMP-Smad1/5/8 Signaling. PLoS ONE 9(12): e113785. doi:10.1371/journal.pone.0113785

**Editor:** Austin John Cooney, Baylor College of Medicine, United States of America

**Received:** August 4, 2014

**Accepted:** October 29, 2014

**Published:** December 3, 2014

**Copyright:** © 2014 Li et al. This is an open-access article distributed under the terms of the [Creative Commons Attribution License](http://creativecommons.org/licenses/by/4.0/), which permits unrestricted use, distribution, and reproduction in any medium, provided the original author and source are credited.

**Data Availability:** The authors confirm that all data underlying the findings are fully available without restriction. All relevant data are within the paper and its Supporting Information files.

**Funding:** The work was supported by grants from the Ministry of Science and Technology of China (The National Key Scientific Program (2012CB966901, to BL))(<http://www.most.gov.cn/>) and the National Natural Science Foundation of China (81130039, 31071229, and 81121001(<http://www.nsf.gov.cn/>)). The funders had no role in study design, data collection and analysis, decision to publish, or preparation of the manuscript.

**Competing Interests:** The authors have declared that no competing interests exist.

## Abstract

Platelet-derived growth factors (PDGFs) play important roles in skeletal development and bone fracture healing, yet how PDGFs execute their functions remains incompletely understood. Here we show that PDGF-AA, but not -AB or -BB, could activate the BMP-Smad1/5/8 pathway in mesenchymal stem cells (MSCs), which requires BMPRIA as well as PDGFR $\alpha$ . PDGF-AA promotes MSC osteogenic differentiation through the BMP-Smad1/5/8-Runx2/Osx axis and MSC migration via the BMP-Smad1/5/8-Twist1/Atf4 axis. Mechanistic studies show that PDGF-AA activates BMP-Smad1/5/8 signaling by feedback down-regulating PDGFR $\alpha$ , which frees BMPRI and allows for BMPRI-BMPRII complex formation to activate smad1/5/8, using BMP molecules in the microenvironment. This study unravels a physical and functional interaction between PDGFR $\alpha$  and BMPRI, which plays an important role in MSC differentiation and migration, and establishes a link between PDGF-AA and BMPs pathways, two essential regulators of embryonic development and tissue homeostasis.

## Introduction

PDGFs are growth factors that promote cell proliferation and migration. In addition, PDGFs have been shown to regulate cell differentiation, although the underlying mechanisms remain largely unknown [1–3]. There are four PDGFs (A–D) that are expressed in tissue-specific manners [1]. PDGF molecules bind to specific cell surface receptor PDGFRs, which are members of receptor tyrosine kinases, to execute their functions [1, 2]. PDGF-AA mainly activates PDGFR $\alpha$  while PDGF-BB activates PDGFR $\beta$ . The main signaling pathways downstream of PDGFRs include MAPKs, PI-3K, Stat3, and the Rho/Rac cascades, which control cell proliferation, migration, and survival [3]. PDGFs-elicited signaling events are tightly regulated. One regulatory mechanism is endocytosis and lysosome-mediated degradation of PDGFRs, which requires ligand-binding and PDGFR autophosphorylation. This acts as a feedback regulation mechanism to attenuate PDGF signaling [4, 5]. While endocytosed PDGFR $\alpha$  molecules are quickly degraded, there is evidence to support that endocytosed PDGF $\beta$  molecules are recycled back to the cell surface [6].

PDGF-AA is mainly synthesized and secreted by epithelial cells and acts on mesoderm-derived cells, which express PDGFR $\alpha$ . Its main function is to promote mesenchyme expansion in addition to angiogenesis [7–9]. PDGFs have an important function in bone development. PDGFR $\alpha$  ablation led to defects in skeletal patterning and maturation [10, 11]. In adults, PDGFs play important roles in wound healing and bone fracture healing, where it act on fibroblasts, MSCs, and other cell types, and as such PDGFs might present a class of therapeutic regents for wound healing and bone regeneration [7, 12, 13]. At the cell level, PDGFs are shown to promote MSC proliferation [14–16]. While PDGF-BB was reported to inhibit osteoblast differentiation [3, 17], PDGF-AA's function in osteoblast differentiation is inconclusive [18–20]. It remains unclear how PDGFs decide the fate of differentiation or proliferation in MSC.

In this report, we show that PDGF-AA, but not BB, could activate BMP-Smad1/5/8 signaling and thereby promotes MSC osteogenic differentiation via BMP-Smad1/5/8-Runx2/Osx and MSC migration via BMP-Smad1/5/8-Twist1/Atf4. BMPs are growth factors/cytokines that are critical for skeletal development and remodeling and are also used to treat bone fracture ununions [21]. As members of the TGF $\beta$  superfamily, BMPs bind to BMPRI and II and activate the Smad1/5/8 pathway to stimulate osteogenic differentiation [22, 23]. We found that PDGF-AA-induced Smad1/5/8 activation goes through BMPRIA and PDGFR $\alpha$ . PDGF-AA induces down-regulation of PDGFR $\alpha$  and knockdown of PDGFR $\alpha$  by interference RNA led to increased Smad1/5/8 activation, which could not be further activated by PDGF-AA. Furthermore, inhibition of lysosome-mediated protein turnover diminished PDGF-AA-induced Smad1/5/8 activation. These results indicate that PDGFR $\alpha$  is a negative regulator of BMP-Smad1/5/8 signaling and that PDGF-AA activates Smad1/5/8 by down-regulating PDGFR $\alpha$ . Mechanistically, PDGFR $\alpha$  interacts with BMPRIA and this interferes with the interaction between BMPRIA and BMPRII, which is necessary for Smad1/5/8

activation [22]. These findings provide a mechanism by which PDGF-AA regulates MSC differentiation and migration and reveal an unidentified connection between PDGF-PDGFR $\alpha$  and BMP-Smad1/5/8 signaling pathways.

## Materials and Methods

### Ethics Statement

Animal experimentation in this study, including normal C57BL/6 mice and Bmpr1a<sup>fl/fl</sup> mice, was carried out in accordance with recommendations in the National Research Council Guide for Care and Use of Laboratory Animals, with the protocols approved by the Institutional Animal Care and Use Committee of Shanghai, China [SYXK (SH) 2011–0112]. All efforts were made to minimize suffering of mice.

### Mice, MSC isolation and culture

Bmpr1a<sup>fl/fl</sup> mice (on C57BL/6 genetic background) were obtained from Yuji Mishina's Laboratory [24]. Bone marrow derived MSCs were isolated from 8-week old C57BL/6 mice. The bone marrow was collected from femurs and tibiae by flushing with  $\alpha$ -MEM culture medium with a 25-gauge needle. Cell suspensions were mixed with a pipette followed by filtering through a 70-mm strainer to remove any large cell clumps or bone particles. The cells were counted using trypan blue staining and cultured in  $\alpha$ -MEM medium containing 10% fetal bovine serum, 1% L-glutamine and 1% penicillin-streptomycin (Gibco, Invitrogen Corporation, USA) for expansion. After 3 days, the non-adherent cells were removed from the culture by changing the medium, while the adherent cells were sub-cultured. Medium were replaced every 3 days. After 7 day, cells were harvested for a second *in vitro* expansion. MSCs in passages 2–3 were collected and used for further study.

### Osteogenic differentiation

The MSCs were cultured in the osteogenesis differentiation medium:  $\alpha$ -MEM containing 0.5% FBS, 100  $\mu$ g/ml ascorbic acid and 10 mm  $\beta$ -glycerophosphate (Sigma-Aldrich Corp., St. Louis, MO, USA). Medium was changed every 3 days [25]. After 7 and 14 days of differentiation, cells were fixed with 4% paraformaldehyde and stained with a diazonium salt solution composed of fast violet blue salt and 4% naphthol AS-MX phosphate alkaline solution in an ALP kit, according to the manufacturer's protocol (Sigma-Aldrich Corp, St. Louis, MO, USA). Alkaline phosphatase enzymatic quantification was also performed as previously described [26], normalized to total protein content. After 28 days of differentiation, Alizarin Red and Von Kossa staining were performed to detect extracellular mineralization. The MSCs were fixed with 10% formalin for 30 min and stained with 1% silver nitrate solution under ultra- violet light for 45 min. The plates were then washed thoroughly with distilled water and treat with 3%

sodium thiosulphate for 5 min. The presence of mineral deposits was indicated by the development of a black precipitate on the mineralized matrix. In the Alizarin red staining, the fixed cells were stained with a 0.2% Alizarin red S solution (Sigma-Aldrich Corp., St. Louis, MO, USA). The red staining represents calcium deposits on terminal differentiated cells.

### Adipogenic Differentiation and Chondrogenic Differentiation

MSCs were seeded in 12-well plate at a density of 10,000 cells/well for assessment of adipogenesis. MSCs were cultured in STEMPRO<sup>®</sup> Adipogenesis Differentiation Medium (Gibco, Invitrogen Corporation, USA). Oilred O staining was performed after 7 days of differentiation. For the chondrogenesis differentiation assay, generate micromass cultures by seeding 5- $\mu$ l droplets of cell solution of  $1.6 \times 10^7$  cells/ml in the center of 12-well plate wells. After cultivating micromass cultures for 2 h under high humidity conditions, add warmed chondrogenesis media to culture vessels. After 14 days of cultivation, chondrogenic pellets can be processed for Alcian blue staining.

### Immunoprecipitation and western blot analysis

Cells were lysed in TNEN buffer containing 50 mM Tris-HCl (pH 7.5), 100 mM KCl, 1 mM EDTA, 0.5% NP-40, 0.1% Triton X-100, 1 mM Na<sub>3</sub>VO<sub>4</sub>, 10 mM NaF, 1 mM  $\beta$ -glycerol phosphate, 1 mM PMSF, and 1  $\mu$ g/ml of aprotinin, leupeptin, and pepstatin. The immunoprecipitates or equal amounts of total cell lysates (50  $\mu$ g) were resolved by SDS-PAGE and transferred to polyvinylidenedifluoride membranes (Millipore, Billerica, MA, USA). Proteins were detected by western blotting with the indicated antibodies. Antibodies against p-Smad1/5/8, Smad1, HA and His were purchased from Cell Signaling Technology, Inc. (Danvers, MA, USA). Antibodies against PDGFR $\alpha$ , Runx2, Atf4, Osx and  $\beta$ -actin were purchased from Santa Cruz Biotechnology, Inc. (Dallas, Texas, USA). Chloroquine and anti-Flag were purchased from Sigma. Anti-BMPRIA was from Abcam (Cambridge, MA USA). PDGF-AA, PDGF-AB, PDGF-BB and BMP-2 were obtained from PeproTech, Inc. (Suzhou, P.R.China). LDN-193189 was purchased from Selleckchem (Houston, TX, USA).

### Quantitation of western blot results

Western blot results were scanned with a molecular dynamics scanning densitometer. The relative levels of protein of interest were then determined by measuring the intensity of the corresponding bands. All values were averages of cell cultures at least 3 times and were normalized to the constitutive expression of Actin. In all the quantitation data, the values of empty vectors or untreated cells were set as 1.0.

## Quantitative RT-PCR and siRNA

Total RNA was extracted from cultured cells using Trizol reagent (Invitrogen, Carlsbad, CA, USA) according to manufacturer's protocol. cDNA was synthesized using a Quantscript RT Kit (Roche, Clare, Ireland). The detection and quantification of target mRNA was performed with real-time PCR using SYBR Green dye (Applied Biosystems, Foster City, USA), normalized to *GAPDH* expression levels. PCR primers used were depicted in Table S1. Small interference RNA (siRNA) targeting mouse PDGFR $\alpha$  obtained from Santa Cruz Biotechnology (sc-29444) were transfected into MSCs following the manufacturer's protocol. Down-regulation of PDGFR $\alpha$  was evaluated by western blot after a 48 h-transfection.

## Cell migration assays

The MSC migration assay was performed using transwell cell culture inserts (8- $\mu$ m pore size; BD Bioscience, San Jose, CA, USA) for 24-well plates.  $5 \times 10^4$  cells in serum-free media were placed into the upper chamber and incubated at 37°C in 5% CO<sub>2</sub> for 24 h, the cells remaining on the upper membrane were removed with cotton wool, whereas the cells that had migrated through the membrane were stained with 0.1% crystal violet. The number of migratory cells was counted in 5 random fields under a light scope ( $\times 200$ ).

## Statistical analysis

Data are given as mean  $\pm$  standard deviation (SD) of the results from three or four different samples in each item of the experiment. The cells from each sample were separately evaluated. Differences between two groups were measured by the Student's *t*-test. A *p* value less than 0.05 is defined as statistically significant difference.

## Results

### PDGF-AA activates Smad1/5/8 in MSC in a BMPRIA-dependent manner

Genetic studies have shown that PDGF molecules play important roles in MSC proliferation [27, 28], skeletal development and bone fracture healing, processes that involve bone morphogenetic proteins (BMPs) as well [23, 29–31]. We wanted to test whether there exists a connection between the PDGF and BMP signaling pathways in primary murine MSC cells. MSCs were isolated from the bone marrow of adult mice and they were able to adhere to the culture dish and proliferate for more than 5 generations. Moreover, they showed the capacity to differentiate into chondrocyte, adipocyte, or osteoblast (Fig. S1 and later results). We treated the primary mouse MSCs with PDGF-AA, AB, or BB for different periods of time and monitored Smad1/5/8 activation with specific antibodies.

Since PDGF molecules are the major mitogens in the serum (up to tens of ng per ml) [32, 33], we starved MSCs from serum for 4 h before adding PDGF molecules. Under this condition, basal levels of Smad1/5/8 phosphorylation were detectable, which might be attributable to autocrine BMP molecules. Note that separation of the phosphorylated Smad1/5/8 SDS-PAGE gels was affected by the percentage of acrylamide and the running time. We found that PDGF-AA, but not AB or BB, significantly activated Smad1/5/8 (Fig. 1A and Fig. S2 and S3). However, PDGF molecules failed to activate Smad2/3, the TGF $\beta$ -responsive Smads (Fig. 1A), pointing to a specific link between PDGF-AA and BMP-Smad1/5/8 signaling. PDGF-AA could activate Smad1/5/8 in primary mouse embryonic fibroblasts as well (Fig. S4).

Smad1/5/8 phosphorylation is carried out by BMPRI [24]. We found that PDGF-AA-induced Smad1/5/8 activation requires BMPRIA as transient knockout of BMPRIA using retrovirus-expressed Cre in *Bmpr1a*<sup>fl/fl</sup> MSC cells diminished PDGF-AA induced Smad1/5/8 activation (Fig. 1B). Moreover, inhibition of BMP receptor I with LDN-193189, a derivative of Dorsomorphin (compound C) and a highly selective BMPRI inhibitor [34], also diminished PDGF-AA-induced Smad1/5/8 activation (Fig. 1C). The results obtained from the studies on the BMPRI inhibitor and BMPRIA deficient cells suggest that PDGF-AA activates Smad1/5/8 signaling via BMPRIA in MSCs. However, we found that PDGF-AA did not alter the expression of BMPRIA and BMPRII at the protein levels (Fig. 1A), nor did it affect the protein levels of BMP2 in the culture medium, a major pro-osteogenesis agent (Fig. S5). These results suggest that PDGF-AA-induced activation of BMP-Smad1/5/8 signaling is not by altering the expression of BMPs or BMP receptors.

### PDGF-AA induces MSC osteogenic differentiation via Smad1/5/8

To test the functions of PDGF-AA-induced Smad1/5/8 activation, we first looked at MSC osteogenic differentiation, a cellular event promoted by BMP-Smad1/5/8 signaling via transcription factors such as Runx2, Osterix, and Atf4 [25, 35]. We treated primary MSC with PDGF-AA for 7–28 days in differentiation medium and found that PDGF-AA induced ALP expression, evidenced by histological staining and quantitation assays (Fig. 2A and 2B), and promoted MSC mineralization, justified by Von Kossa or Alizarin red staining (Fig. 2C). The stimulatory activity of PDGF-AA on MSC osteogenic differentiation was diminished by co-treatment with BMPRI inhibitor LDN-193189 (Fig. 2A–2C), suggesting that PDGF-AA promotes osteogenic differentiation via BMP-Smad1/5/8 signaling. In addition, we found that PDGF-AA up-regulates the mRNA levels of Runx2, Osterix, and Atf4, which were diminished by LDN-193189 treatment (Fig. 2D). Western blot analysis confirmed that PDGF-AA also increased the protein levels of Runx2, Osterix, and Atf4 in a BMP-Smad1/5/8-dependent manner (Fig. 2E). On the other hand, PDGF-AA did not affect the expression of Sox9, a master transcription factor required for MSC differentiation into chondrocytes, nor did PDGF-AA affect the expression of C/EBP $\alpha$  or PPAR $\gamma$ , two transcription factors

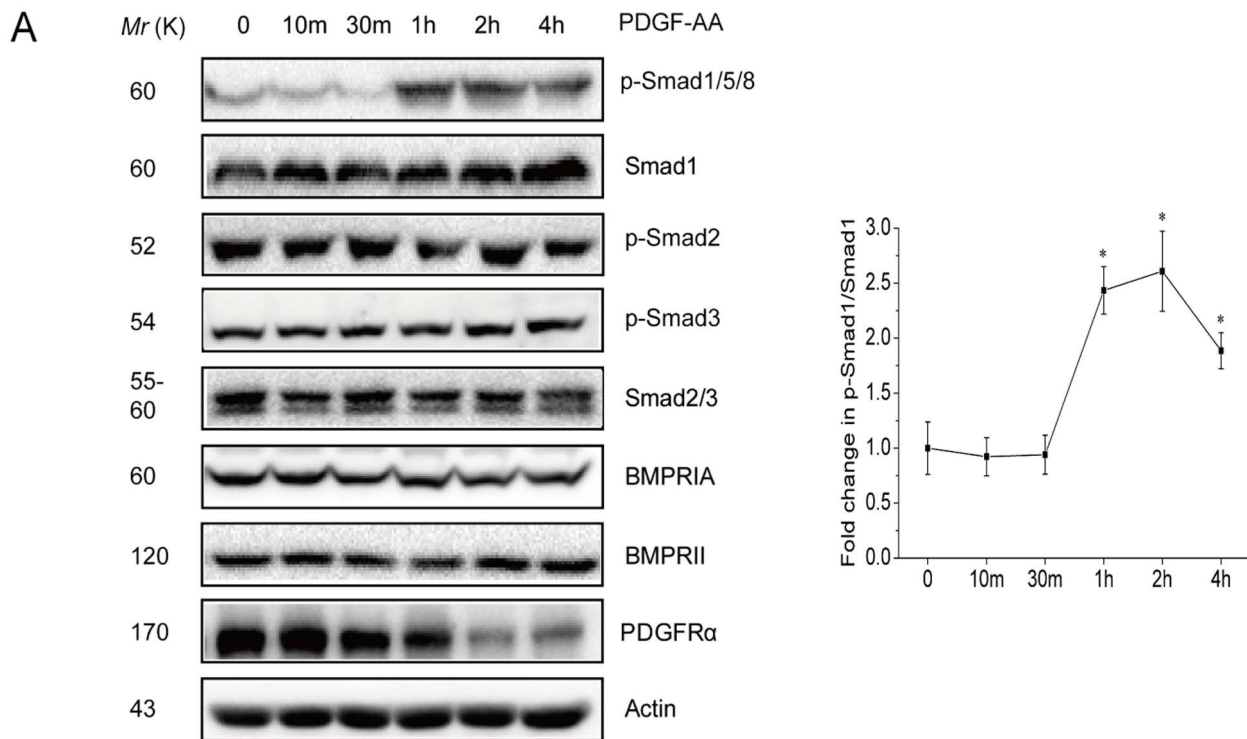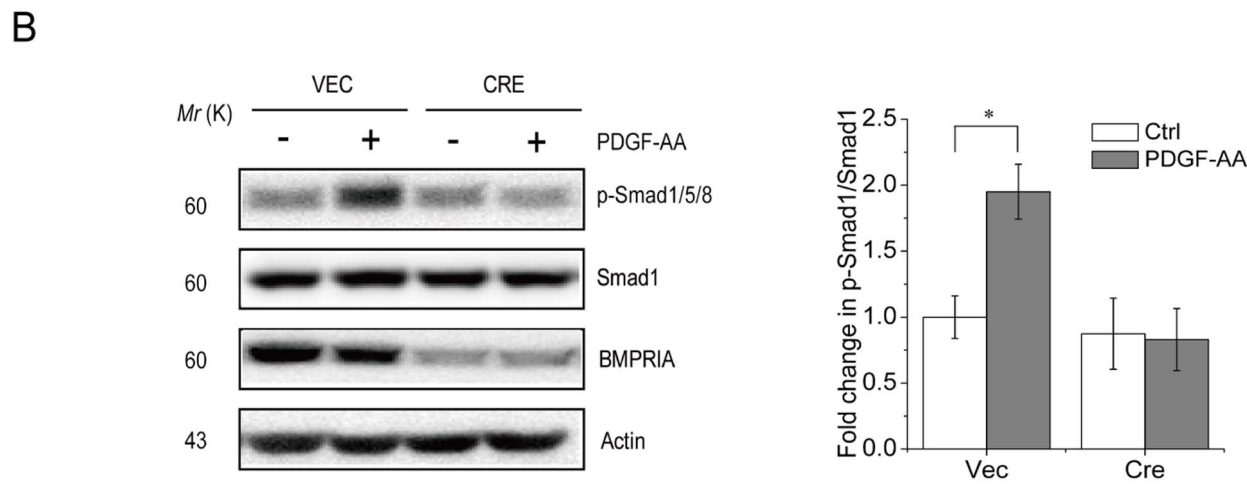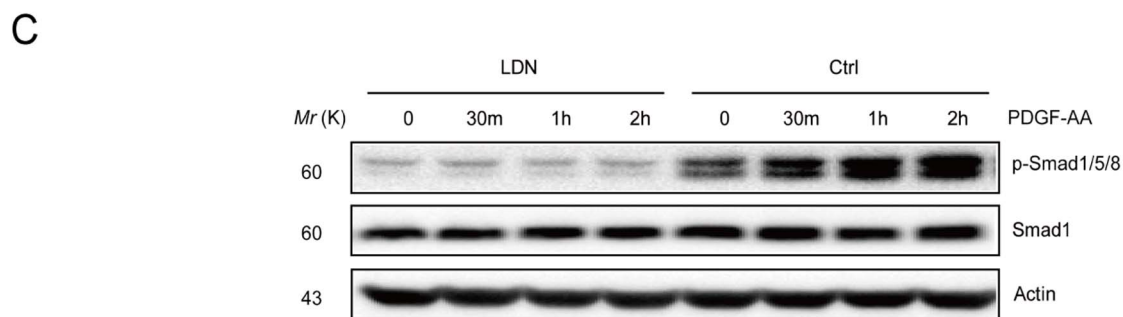

**Figure 1. PDGF-AA activates BMP-Smad1/5/8 pathway via BMPRIA in MSC cells.** A. PDGF-AA activates Smad1/5/8 but not Smad2/3 in MSC cultures. Primary MSC mouse cells were starved from serum for 4 h and then 25 ng/ml of PDGF-AA was added to the cultures. Cells were harvested at different time points and were lysed to analyze the activation of Smad1/5/8 and Smad2/3 by western blot. Right panel: quantitation data. B. BMPRIA deficiency diminished Smad1/5/8 activation at the basal level or in response to PDGF-AA. Primary mouse MSC cells were infected with control virus or virus expressing Cre and selected for 5 days, to knock out BMPRIA. These cells were serum starved and treated with PDGF-AA for 2 hrs. Cells were harvested to analyze the activation of Smad1/5/8 by western blot. Right panel: quantitation data. C. BMPRI inhibitor LDN-193189 diminished Smad1/5/8 activation at the basal level or in response to PDGF-AA. Primary mouse MSC cells were serum starved for 4 hrs, pretreated with LDN-193189 for 1 hr and then treated with PDGF-AA for different periods of time. Cells were harvested to analyze the activation of Smad1/5/8 by western blot. Data are means  $\pm$  s.e.m. (n=3 for all panels). \*  $p < 0.05$ , when compared to empty vectors or untreated cells.

doi:10.1371/journal.pone.0113785.g001

required for MSC differentiation into adipocytes (Fig. 2D). These results suggest that PDGF-AA stimulates MSC differentiation into osteoblasts, via the BMP-Smad1/5/8-Runx2/Osx/Atf4 axis, without affecting its differentiation into chondrocytes or adipocytes. It is well known that PDGF-AA promotes MSC proliferation [8, 36]. We found that inhibition of BMPR with LDN-193189 showed no effect on this cellular event (Unpublished observations).

### PDGF-AA induces MSC migration via Smad1/5/8

Both PDGF-AA and BMPs have chemotactic activities in various cell types [1–3]. Here we show that PDGF-AA could induce migration of MSC, justified by a transwell assay, which was inhibited by pretreatment with LDN-193189 (Fig. 3A), suggesting that part of the PDGF-AA's chemotactic activity on MSC cells can be mediated by BMP-Smad1/5/8 signaling. BMPs regulate cell migration via target genes including Id1, Twist1, Snail, and E-Cadherin [29, 37–39]. We found that the mRNA levels of BMP target gene Twist1 and Id1 were up-regulated by PDGF-AA in a BMP-Smad1/5/8-dependent manner (Fig. 3B), yet expression of other proteins involved in cell migration, e.g., Snail and E-Cadherin, was not altered. Moreover, it has been reported that BMPs could induce cell migration via Atf4 [40], which was also induced by PDGF-AA in a BMP-Smad1/5/8-dependent manner (Fig. 2D and 2E). These results suggest that the effect of PDGF-AA on MSC migration can be at least partially mediated by the BMP-Smad1/5/8 and its target genes including Id1, Twist1, and Atf4.

### PDGF-AA induced Smad1/5/8 activation requires lysosome-mediated degradation of PDGFR $\alpha$

Having shown the biological significance of PDGF-AA-induced Smad1/5/8 activation in MSCs, we wanted to understand the molecular mechanisms underlying Smad1/5/8 activation in response to PDGF-AA. We have excluded the possibility that Smad1/5/8 activation in response to PDGF-AA was caused by change in BMPs or BMPRs (Fig. 1A and Fig. S5). It is possible that PDGFR directly act on BMPRs and/or Smad1/5/8 to regulate their activation. PDGF-AA ligation to its receptors causes PDGFR $\alpha$  dimerization, which activates the



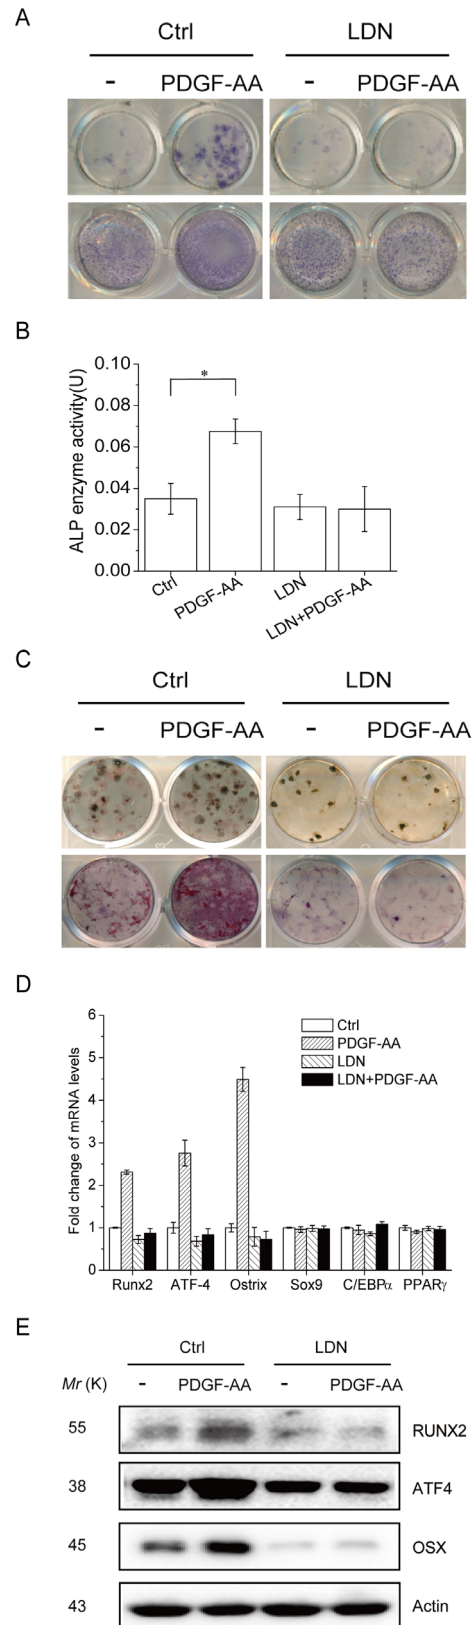

**Figure 2. PDGF-AA promotes MSC osteogenic differentiation.** A. PDGF-AA promotes ALP expression in MSC, which requires BMP-Smad1/5/8 signaling. Primary mouse MSC cells were cultured with or without PDGF-AA for 7 or 14 days. To test the effect of BMPRI activation, LDN-193189 was included in the culture medium. ALP was stained 7 or 14 days after culture. B. Quantitation data for ALP activities that were normalized to the total protein levels of each culture. C. PDGF-AA promotes bone mineralization in MSC, which requires BMP-Smad1/5/8 signaling. Primary mouse MSC cells were cultured in differentiation medium with or without PDGF-AA (changed every 3 days) for 28 days. To test the effect of BMPRI activation, LDN-193189 was included in the culture medium. Mineralization was stained with Von Kossa and Alizarin red method. D. PDGF-AA up-regulated the mRNA levels of Runx2, Atf4, and Osx via the BMP-Smad1/5/8 signaling, without affecting the mRNA levels of Sox9, C/EBP $\alpha$ , or PPAR $\gamma$ . Primary MSC cells were cultured with or without PDGF-AA for 7 days. To test the effect of BMPRI activation, LDN-193189 was included in the culture medium. Total RNA was isolated from the cells and realtime PCR was carried out to determine the mRNA levels of the six transcription factors. Data are means  $\pm$  s.e.m. (n=3 for all panels). \* p<0.05, when compared to empty vectors or untreated cells. E. PDGF-AA up-regulated the protein levels of Runx2, Atf4, and Osx via the BMP-Smad1/5/8 signaling. The experiments were carried out as described in [Fig. 2D](#) and the protein levels of these proteins were determined by western blot.

doi:10.1371/journal.pone.0113785.g002

downstream Erk and Akt1 pathways, followed by endocytosis and lysosome-mediated degradation of PDGFR $\alpha$ , which serve as a negative feedback mechanism [4, 5]. Down-regulation of PDGFR $\alpha$  was also observed in MSCs in response to PDGF-AA ([Fig. 1A](#)). To test whether down-regulation of PDGFR $\alpha$  plays a role in PDGF-AA-induced Smad1/5/8 activation, we knocked down PDGFR $\alpha$  with siRNA and found that this led to an increase in Smad1/5/8 activation at the basal level but a lack of further activation in response to PDGF-AA ([Fig. 4A](#)), suggesting that PDGFR $\alpha$  might inhibit BMP-Smad1/5/8 activation. Furthermore, we found that PDGFR $\alpha$  knockdown enhanced BMP2-induced Smad1/5/8 activation in MSCs as well ([Fig. 4B](#)), confirming that decreased levels of PDGFR $\alpha$  enhances BMP-Smad1/5/8 activation. If this is true, inhibition of PDGFR degradation should abolish PDGF-AA-induced Smad1/5/8 activation. PDGFR $\alpha$ , as well as many other receptor tyrosine kinases, is degraded in the lysosomes after activation, which could be inhibited by chloroquine or NH $_4$ Cl. We indeed found that inhibition of lysosome-mediated protein degradation by chloroquine or NH $_4$ Cl stabilized PDGFR $\alpha$  and diminished PDGF-AA-induced Smad1/5/8 activation ([Fig. 4C](#)). These results, taken together, indicate that PDGF-AA activates BMP-Smad1/5/8 signaling by down-regulating PDGFR $\alpha$  via lysosomes.

### PDGFR $\alpha$ interacts with BMPRIA

How does decreased expression of PDGFR $\alpha$  enhance BMP-Smad1/5/8 signaling? PDGFR $\alpha$  may suppress BMPRIA-mediated Smad1/5/8 activation by interacting with and/or phosphorylating BMPRI, BMPRII, or Smad1/5/8. In co-expression experiments, we found that PDGFR $\alpha$  failed to tyrosine phosphorylate BMPRIA, BMPRII, or Smad1/5/8 ([Fig. 5A](#) and unpublished observations). In co-immunoprecipitation experiments, we found that ectopically expressed PDGFR $\alpha$  interacts with BMPRI as PDGFR $\alpha$  could bring down co-expressed BMPRIA at the basal levels ([Fig. 5A and 5B](#)). Moreover, BMPRIA could also bring down co-expressed PDGFR $\alpha$  at the basal levels ([Fig. 5B](#)). These results suggest that BMPRIA and PDGFR $\alpha$  constantly form a complex. On the contrary, PDGFR $\alpha$  did

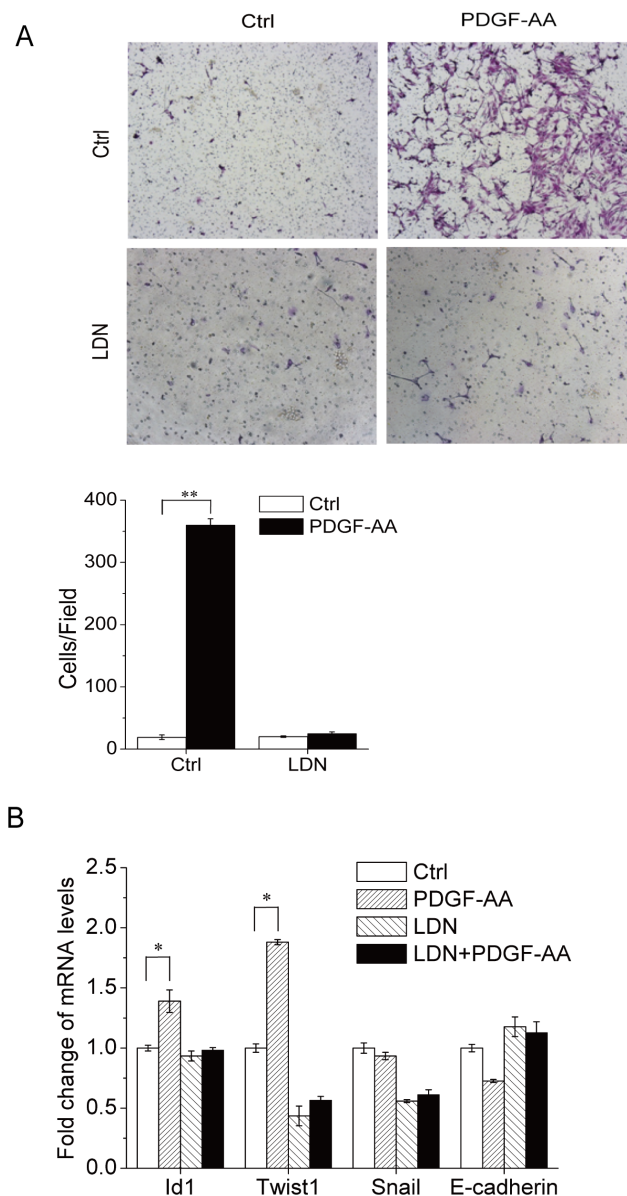

**Figure 3. PDGF-AA promotes MSC migration via BMP-Smad1/5/8 signaling.** A. Transwell experiments and quantitation data. Migration of MSCs was evaluated using a transwell chamber equipped with an 8- $\mu$ m-pore filter membrane. Cells were plated at  $5 \times 10^4$  cells/well in serum-free media onto the upper compartment of the chamber and cultured in the absence or presence of PDGF-AA for 24 h. The filter membrane was removed, fixed with methanol, and stained with 0.1% crystal violet. Lower panel: the number of cells that had migrated to the lower surface of the filter membrane was counted in 5 random fields under a light scope ( $\times 200$ ). B. PDGF-AA promotes expression of BMP-Smad1/5/8-controlled genes that regulate cell migration. Primary mouse MSC cells were cultured with or without PDGF-AA for 7 days. To test the effect of BMPRI activation, LDN-193189 was included in the culture medium. Total RNA was isolated from the cells and realtime-PCR was carried out to determine the mRNA levels of genes that are involved in regulating cell migration. Data are means  $\pm$  s.e.m. (n=3). \*  $p < 0.05$ , \*\*  $P < 0.01$  when compared to empty vectors or untreated cells.

doi:10.1371/journal.pone.0113785.g003

A

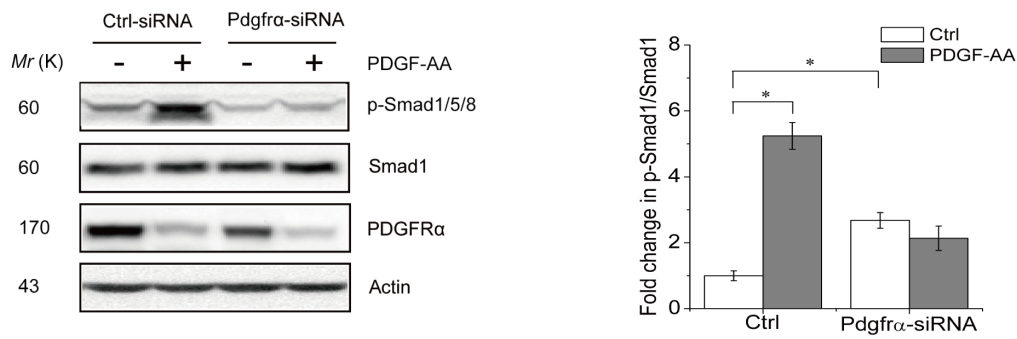

B

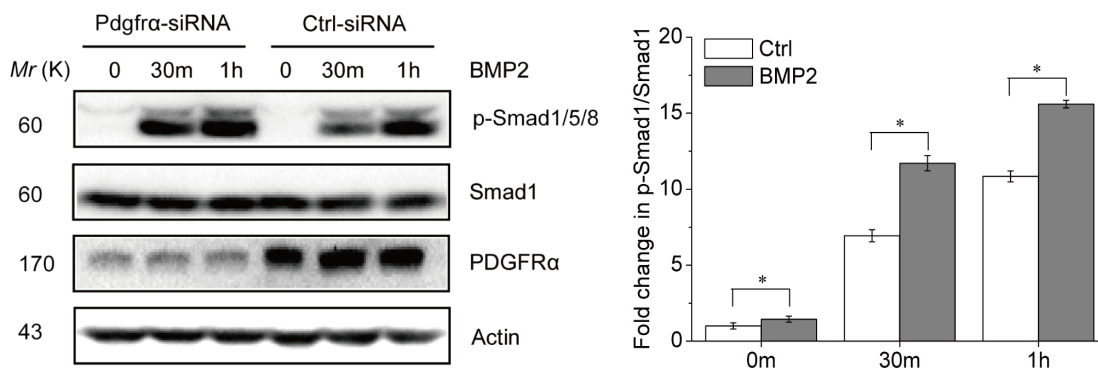

C

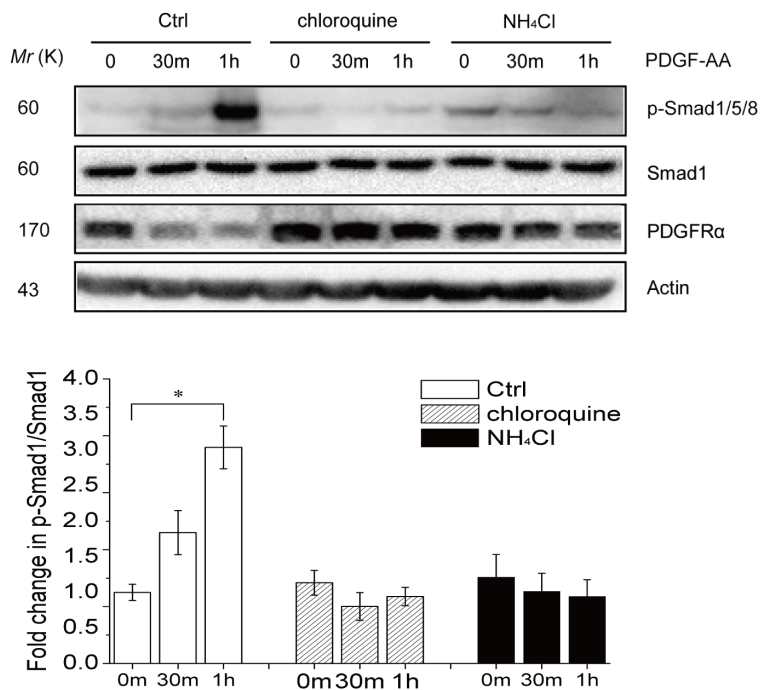

**Figure 4. PDGFR $\alpha$  shows an inhibitory effect on Smad1/5/8 activation.** A. PDGFR $\alpha$  knockdown enhanced Smad1/5/8 activation at the basal level but diminished PDGF-AA-induced Smad1/5/8 activation. Primary mouse MSC cells were transfected with control or siRNA against PDGFR $\alpha$  for 2 days. The cells were then treated with PDGF-AA for 2 hrs. Cells were harvested to analyze the activation of Smad1/5/8 by western blot. Right panel: quantitation data. B. PDGFR $\alpha$  knockdown enhanced Smad1/5/8 activation in response to BMP2. Primary mouse MSC cells were transfected with control or siRNA against PDGFR $\alpha$  for 2 days. The cells were then treated with 50 ng/ml of BMP2 for 0.5 or 1 hr. Cells were harvested to analyze the activation of Smad1/5/8 by western blot. Right panel: quantitation data. C. Inhibition of lysosome-mediated protein degradation diminished PDGF-AA-induced Smad1/5/8 activation. Primary mouse MSC cells were pretreated with chloroquine or NH<sub>4</sub>Cl for 6 h and then treated with PDGF-AA for 1 or 2 hrs. Cells were harvested to analyze the activation of Smad1/5/8 by western blot. Lower panel: quantitation data. Data are means  $\pm$  s.e.m. (n=3 for all panels). \*, p<0.05, when compared to empty vectors or untreated cells.

doi:10.1371/journal.pone.0113785.g004

not bring down Smad1/5/8 or BMPRII (Unpublished observations). Further studies show that endogenous BMPRIA and PDGFR $\alpha$  also form a complex in co-immunoprecipitation assays (Fig. 5C).

### PDGFR $\alpha$ interferes with BMPRI-II interaction

The above results suggest that PDGFR $\alpha$ , by complexing with BMPRIA, may compete with BMPRII for BMPRIA binding and thus interfere with BMPRI-BMPRII interaction, which is required for BMPRI activation and Smad1/5/8 phosphorylation. To test this possibility, we carried out co-immunoprecipitation experiments and found that PDGFR $\alpha$  expression resulted in a decrease in BMPRI-II complex formation. In the presence of PDGFR $\alpha$ , BMPRIA brought down a reduced amount of BMPRII especially 30 min and 2 h after PDGF-AA treatment (Fig. 6A, compare lanes 4–6 to 1–3). Moreover, the presence of PDGFR $\alpha$  also decreased the levels of BMPRIA that was brought down by BMPRII (Fig. 6B, compare lanes 1–3 to 4–6). These results suggest that PDGFR $\alpha$  inhibits BMP-Smad1/5/8 activation by interacting with BMPRIA and interfering with BMPRI-BMPRII interaction.

### Discussion

PDGFs play important roles in bone development and bone fracture healing. PDGF-AA can be synthesized by bone cells and PDGF molecules are present at the bone fracture sites [6, 41–44]. The importance of PDGF-AA was also reflected by PDGFR $\alpha$  null mice, which showed defects in skeletal development and osteoblast survival [9]. Here we show that PDGF-AA is capable of promoting MSC migration and osteogenic differentiation, which might contribute to the physiological activities of PDGF-AA and PDGFR $\alpha$  in bone development and repair.

Our study shows that only PDGF-AA, but not BB or AB isoforms, has the ability to promote MSC differentiation and migration via activating BMP-Smad1/5/8 signaling. This is agreeable with the findings that PDGFR $\alpha$  null mice showed bone-related phenotypes whereas PDGFR $\beta$  null mice showed defects in

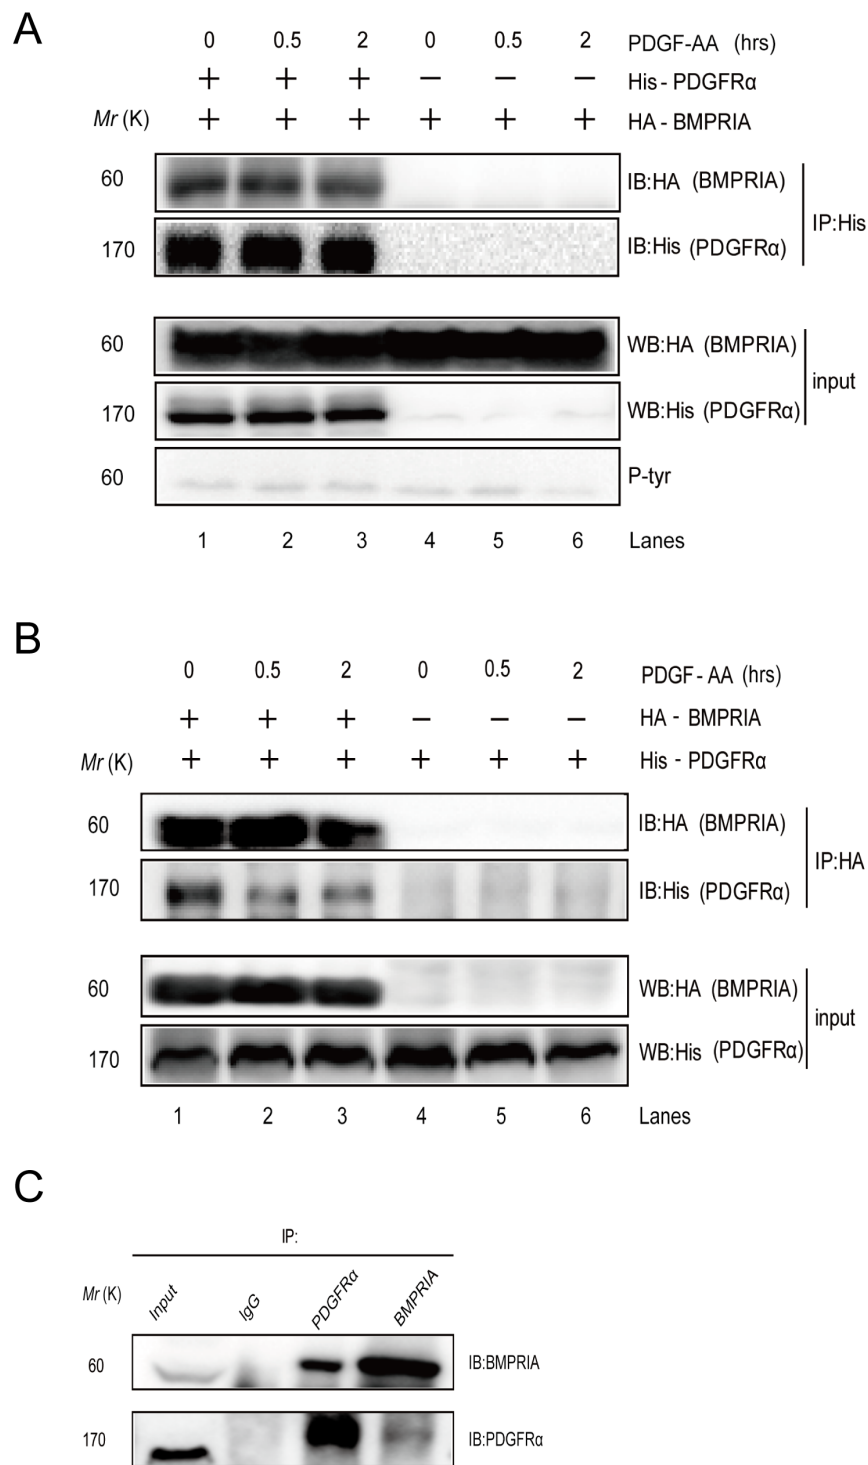

**Figure 5. PDGFR $\alpha$  interacts with BMPRIA.** A. PDGFR $\alpha$  (His tagged) was co-expressed with BMPRIA(HA tagged) in 293T cells. The cells were treated with 25 ng/ml PDGF-AA for 0.5 or 2 h or untreated. Cell lysates were divided into two parts for analysis of PDGFR $\alpha$  and BMPRIA expression by western blot, or immunoprecipitation of PDGFR $\alpha$  to test whether BMPRIA was brought down with PDGFR $\alpha$ . B. PDGFR $\alpha$  (His tagged) was co-expressed with BMPRIA(HA tagged) in 293T cells. The cells were treated with 25 ng/ml PDGF-AA for 0.5 or 2 h or untreated. Cell lysates were divided into two parts for analysis of PDGFR $\alpha$  and

BMPRIA expression by western blot, or immunoprecipitation of BMPRIA to test whether PDGFR $\alpha$  was brought down with BMPRIA. C. Co-immunoprecipitation of endogenous PDGFR $\alpha$  and BMPRIA. Primary MSC cells were lysed and cleaned lysates were incubated with IgG, anti-BMPRIA antibodies, or anti-PDGFR $\alpha$  antibodies overnight at 4°C. The immunoprecipitated proteins and their interacting proteins were detected by western blot.

doi:10.1371/journal.pone.0113785.g005

hematopoiesis and blood vessel formation [1, 45, 46], and that PDGF-BB promotes osteoblast proliferation but represses osteogenic differentiation [17]. It was reported that PDGF-BB is synthesized and secreted by osteoclasts and inhibits osteogenic differentiation, suggesting that PDGF-BB might play a role in coupling bone resorption and bone formation [47]. All these results indicate that PDGF-AA and PDGF-BB might play distinct functions in MSC cells, which was attributable to their differential influence on BMP-Smad1/5/8 signaling. There are a few possibilities to explain why PDGF-AA but not PDGF-BB activates BMP-Smad1/5/8 signaling. Firstly, the difference between PDGF-AA and BB might be caused by the fact that PDGFR $\beta$  is usually recycled back to the cell surface [1]. However, we found that PDGF-BB could also result in down-regulation of PDGFR $\beta$  in MSC cells (Fig. S3), suggesting that this may not be the main reason. Secondly, previous studies showed that PDGFR $\beta$  is expressed at lower levels in osteoblast and PDGFR $\alpha$  is the major form [36, 48, 49]. It is thus possible that the change in PDGFR $\beta$  protein levels was not adequate to affect BMPRI-BMPRII interaction. Thirdly, it is possible that PDGFR $\beta$  might have a low affinity for BMPRI, which will not affect BMPRI-BMPRII interaction or BMP-Smad1/5/8 signaling. Future studies will be needed to distinguish these possibilities.

PDGFs and BMPs play critical roles in skeletal development, bone remodeling, and bone fracture repair [1, 50]. This study reveals a novel connection between PDGF-AA-PDGFR $\alpha$  and BMP-Smad1/5/8 signaling in MSC differentiation and migration. Previous studies have shown that growth factors including PDGFs inhibit BMP-Smad1/5/8 signaling by blocking Smad1/5/8 nuclear entry, which is mediated by Erks-mediated Smad1/5/8 phosphorylation at the linker region [51, 52], a region with multiple phosphorylation sites that integrate signaling from Wnt, Atm, and other pathways [53–57]. This study shows that PDGFR $\alpha$  also inhibits BMP-Smad1/5/8 signaling by interacting with BMPRI and interfering with BMPRI-BMPRII complex formation. During bone development and bone fracture healing, PDGF-AA-induced Erk1/2 activation promotes cell proliferation and its inhibition on Smad1/5/8 activation helps to block premature MSC differentiation and thus facilitates MSC expansion. Later on, Erk1/2 activation is attenuated, which relieves the inhibitory effect on BMP-Smad1/5/8 signaling. Furthermore, endocytosis-mediated PDGFR $\alpha$  turnover further stimulates BMP-Smad1/5/8 signaling by allowing BMPRI-BMPRII interaction, thus promoting osteogenic differentiation. Thus, PDGF-AA might initially augment MSC proliferation and later promote MSC osteogenic differentiation and migration, by modulating the BMP-Smad1/5/8 signaling. PDGF-AA released at the wound can

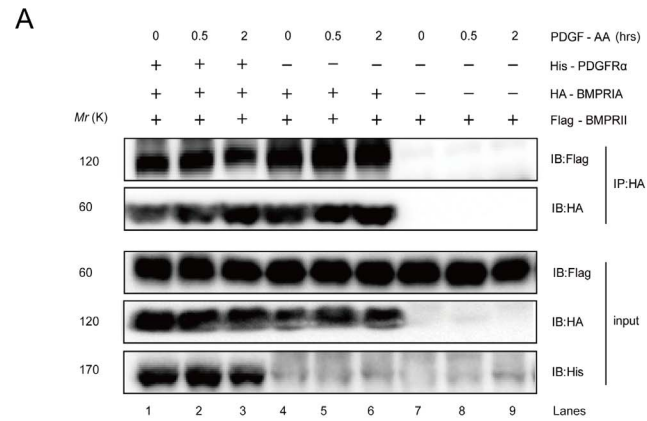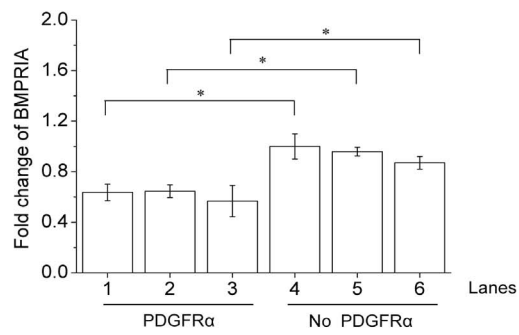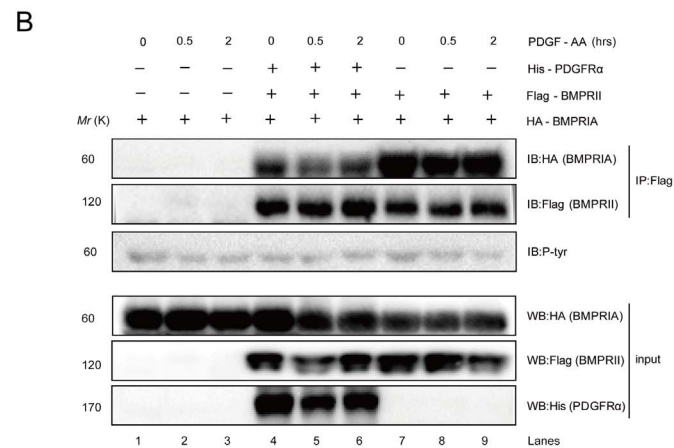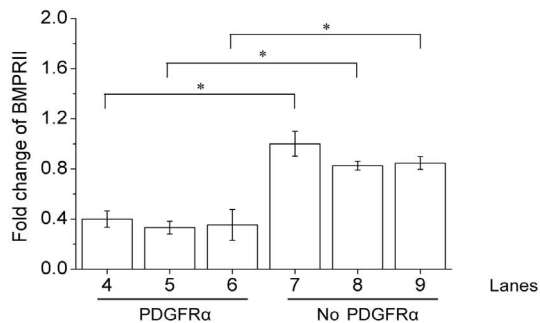



**Figure 6. PDGFR $\alpha$  interferes with BMPRI-BMPRII interaction.** A. PDGFR $\alpha$  (His tagged) was co-expressed with BMPRIA (HA tagged) and BMPRII (Flag tagged) in 293T cells. The cells were treated with 25 ng/ml PDGF-AA for 0.5 or 2 h or untreated. Cell lysates were divided into two parts for analysis of BMPRIA and BMPRII expression by western blot, or immunoprecipitation of BMPRIA to test whether the level of BMPRII brought down with BMPRIA was affected by expression of PDGFR $\alpha$ . Right panel: quantitation data. \*,  $p < 0.05$ , when compared to empty vectors transfected cells. B. PDGFR $\alpha$  (His tagged) was co-expressed with BMPRIA (HA tagged) and BMPRII (Flag tagged) in 293T cells. The cells were treated with 25 ng/ml PDGF-AA for 0.5 or 2 h or untreated. Cell lysates were divided into two parts for analysis of BMPRIA and BMPRII expression by western blot, or immunoprecipitation of BMPRII to test whether the level of BMPRIA brought down with BMPRII was affected by expression of PDGFR $\alpha$ . Right panel: quantitation data. \*,  $p < 0.05$ , when compared to empty vectors transfected cells.

doi:10.1371/journal.pone.0113785.g006

help not only MSC recruitment and expansion but also osteogenic differentiation, and thus helping bone fracture healing via multiple ways.

Both BMPs and PDGF-AA play critical roles in embryonic development, adult tissue homeostasis, and tumorigenesis [2, 6, 41–44, 58]. Besides the bone, PDGF-AA and BMPs play important roles in intestinal villi and hair follicle formation, where they seem to have opposite functions. In adult, both PDGF-AA and BMPs are present in the stem cell niche for intestinal stem cells and hair follicle stem cells and they regulate the self-renewal and/or differentiation of these stem cells. In addition, Both PDGF-AA and BMPs are involved in tumorigenesis, e.g., glioma [1]. While PDGF-AA has pro-tumorigenesis activities, BMPs usually have anti-tumorigenesis activities. It will be interesting to test whether the interaction of PDGFR $\alpha$  and BMPRI plays a role in these processes.

In summary, our studies reveal that PDGF-AA regulates MSC osteogenic differentiation and migration via BMP-Smad1/5/8 signaling. PDGF-AA exerts its functions by inducing feedback degradation of PDGFR $\alpha$ , which was shown to be a BMPRI-interacting protein that interferes with BMPRI and BMPRII interaction. The physical and functional interaction between BMPRIA and PDGFR $\alpha$  may play roles in other cellular and developmental processes that involve PDGF-AA and BMPs.

## Supporting Information

**Figure S1.** The mouse primary MSCs have the differentiation potential. MSCs were seeded in 12-well plate at a density of 10,000 cells/well for assessment of adipogenesis in the presence of adipogenesis differentiation medium. Oilred O staining was performed after 7 days of culture. For the chondrogenesis differentiation assay, we generated micromass cultures by seeding 5- $\mu$ l droplets of cell solution of  $1.6 \times 10^7$  cells/ml in the center of 12-well plate wells. After 14 days of cultivation in the chondrogenesis medium, chondrogenic pellets were detected with Alcian blue staining.

doi:10.1371/journal.pone.0113785.s001 (TIF)

**Figure S2.** PDGF-AB could not activate Smad1/5/8 or Smad2/3 in MSC cultures. Primary MSC cells were starved from serum for 4 hrs and then treated with 25 ng/ml PDGF-AB. Cells were harvested at different time points and lysed to

analyze the activation of Smad1/5/8 and Smad2/3 by western blot. Three western blotting results and quantitation data from three repeated experiments were shown. Right panel: quantitation data.

[doi:10.1371/journal.pone.0113785.s002](https://doi.org/10.1371/journal.pone.0113785.s002) (TIF)

**Figure S3.** PDGF-BB could not activate Smad1/5/8 or Smad2/3 in MSC cultures. Primary MSC cells were starved from serum for 4 hrs and then treated with 25 ng/ml PDGF-BB. Cells were harvested at different time points and lysed to analyze the activation of Smad1/5/8 and Smad2/3 by western blot. Three western blotting results and quantitation data from three repeated experiments were shown. Right panel: quantitation data.

[doi:10.1371/journal.pone.0113785.s003](https://doi.org/10.1371/journal.pone.0113785.s003) (TIF)

**Figure S4.** PDGF-AA activates Smad1/5/8 in MEF cultures. Primary MEF cells were starved from serum for 4 hrs and then treated with 25 ng/ml PDGF-AA. Cells were harvested at different time points and lysed to analyze the activation of Smad1/5/8 by western blot.

[doi:10.1371/journal.pone.0113785.s004](https://doi.org/10.1371/journal.pone.0113785.s004) (TIF)

**Figure S5.** PDGF-AA does not affect the protein levels of BMP2 in the culture media. To test whether PDGF-AA could induce the secretion of BMP2, we serum starved the cells for 4 hrs, and then added 25 ng/mL PDGF-AA to the culture medium of MSCs for 4 hrs. The culture medium was then collected to determine the concentration of BMP2 using a commercial kit (Cloud-Clone Corp) following the manufacturer's protocol.

[doi:10.1371/journal.pone.0113785.s005](https://doi.org/10.1371/journal.pone.0113785.s005) (TIF)

**Table S1.** Oligonucleotide sequences for real-time PCR assays.

[doi:10.1371/journal.pone.0113785.s006](https://doi.org/10.1371/journal.pone.0113785.s006) (DOCX)

**Original Data S1**

[doi:10.1371/journal.pone.0113785.s007](https://doi.org/10.1371/journal.pone.0113785.s007) (RAR)

## Acknowledgments

We would like to thank Lina Gao for technical assistance.

## Author Contributions

Conceived and designed the experiments: AL XX AH BL. Performed the experiments: AL HK. Analyzed the data: AL HL XX. Contributed reagents/materials/analysis tools: AL JY YM. Wrote the paper: BL AL.

## References

1. Andrae J, Gallini R, Betsholtz C (2008) Role of platelet-derived growth factors in physiology and medicine. *Genes Dev* 22: 1276–1312.
2. Hoch RV, Soriano P (2003) Roles of PDGF in animal development. *Development* 130: 4769–4784.

3. **Donovan J, Abraham D, Norman J** (2013) Platelet-derived growth factor signaling in mesenchymal cells. *Front Biosci (Landmark Ed)* 18: 106–119.
4. **Joly M, Kazlauskas A, Fay FS, Corvera S** (1994) Disruption of PDGF receptor trafficking by mutation of its PI-3 kinase binding sites. *Science* 263: 684–687.
5. **Wang Y, Pennock SD, Chen X, Kazlauskas A, Wang Z** (2004) Platelet-derived growth factor receptor-mediated signal transduction from endosomes. *J Biol Chem* 279: 8038–8046.
6. **Karlsson S, Kowanetz K, Sandin A, Persson C, Ostman A, et al.** (2006) Loss of T-cell protein tyrosine phosphatase induces recycling of the platelet-derived growth factor (PDGF) beta-receptor but not the PDGF alpha-receptor. *Mol Biol Cell* 17: 4846–4855.
7. **Caplan AI, Correa D** (2011) PDGF in bone formation and regeneration: new insights into a novel mechanism involving MSCs. *J Orthop Res* 29: 1795–1803.
8. **Caverzasio J, Biver E, Thouverey C** (2013) Predominant role of PDGF receptor transactivation in Wnt3a-induced osteoblastic cell proliferation. *J Bone Miner Res* 28: 260–270.
9. **Fantauzzo KA, Soriano P** (2014) PI3K-mediated PDGFRalpha signaling regulates survival and proliferation in skeletal development through p53-dependent intracellular pathways. *Genes Dev* 28: 1005–1017.
10. **Soriano P** (1997) The PDGF alpha receptor is required for neural crest cell development and for normal patterning of the somites. *Development* 124: 2691–2700.
11. **Tallquist MD, Weismann KE, Hellstrom M, Soriano P** (2000) Early myotome specification regulates PDGFA expression and axial skeleton development. *Development* 127: 5059–5070.
12. **Fierro FA, Kalomiris S, Sondergaard CS, Nolte JA** (2011) Effects on proliferation and differentiation of multipotent bone marrow stromal cells engineered to express growth factors for combined cell and gene therapy. *Stem Cells* 29: 1727–1737.
13. **Graham S, Leonidou A, Lester M, Heliotis M, Mantalaris A, et al.** (2009) Investigating the role of PDGF as a potential drug therapy in bone formation and fracture healing. *Expert Opin Investig Drugs* 18: 1633–1654.
14. **Caverzasio J, Biver E, Thouverey C** (2013) Predominant role of PDGF receptor transactivation in Wnt3a-induced osteoblastic cell proliferation. *J Bone Miner Res* 28: 260–270.
15. **Yang D, Chen J, Jing Z, Jin D** (2000) Platelet-derived growth factor (PDGF)-AA: a self-imposed cytokine in the proliferation of human fetal osteoblasts. *Cytokine* 12: 1271–1274.
16. **Huang W, Fridman Y, Bonfil RD, Ustach CV, Conley-LaComb MK, et al.** (2012) A novel function for platelet-derived growth factor D: induction of osteoclastic differentiation for intraosseous tumor growth. *Oncogene* 31: 4527–4535.
17. **Tokunaga A, Oya T, Ishii Y, Motomura H, Nakamura C, et al.** (2008) PDGF receptor beta is a potent regulator of mesenchymal stromal cell function. *J Bone Miner Res* 23: 1519–1528.
18. **O'Sullivan S, Naot D, Callon K, Porteous F, Horne A, et al.** (2007) Imatinib promotes osteoblast differentiation by inhibiting PDGFR signaling and inhibits osteoclastogenesis by both direct and stromal cell-dependent mechanisms. *J Bone Miner Res* 22: 1679–1689.
19. **Zhang YY, Cui YZ, Luan J, Zhou XY, Zhang GL, et al.** (2012) Platelet-derived growth factor receptor kinase inhibitor AG-1295 promotes osteoblast differentiation in MC3T3-E1 cells via the Erk pathway. *Biosci Trends* 6: 130–135.
20. **Yu X, Hsieh SC, Bao W, Graves DT** (1997) Temporal expression of PDGF receptors and PDGF regulatory effects on osteoblastic cells in mineralizing cultures. *Am J Physiol* 272: C1709–1716.
21. **Li B** (2008) Bone morphogenetic protein-Smad pathway as drug targets for osteoporosis and cancer therapy. *Endocr Metab Immune Disord Drug Targets* 8: 208–219.
22. **Massague J** (2012) TGFbeta signalling in context. *Nat Rev Mol Cell Biol* 13: 616–630.
23. **Canalis E** (2009) Growth factor control of bone mass. *J Cell Biochem* 108: 769–777.
24. **Mishina Y, Starbuck MW, Gentile MA, Fukuda T, Kasparcova V, et al.** (2004) Bone morphogenetic protein type IA receptor signaling regulates postnatal osteoblast function and bone remodeling. *J Biol Chem* 279: 27560–27566.

25. **Kua H-Y, Liu H, Leong WF, Li L, Jia D, et al.** (2012) c-Abl promotes osteoblast expansion by differentially regulating canonical and non-canonical BMP pathways and p16INK4a expression. *Nat Cell Biol* 14: 727–737.
26. **Wang X, Goh CH, Li B** (2007) p38 mitogen-activated protein kinase regulates osteoblast differentiation through osterix. *Endocrinology* 148: 1629–1637.
27. **Ball SG, Shuttleworth A, Kielty CM** (2012) Inhibition of platelet-derived growth factor receptor signaling regulates Oct4 and Nanog expression, cell shape, and mesenchymal stem cell potency. *Stem Cells* 30: 548–560.
28. **Shah P, Keppler L, Rutkowski J** (2012) A review of Platelet Derived Growth Factor playing pivotal role in bone regeneration. *J Oral Implantol*.
29. **Cao X, Chen D** (2005) The BMP signaling and in vivo bone formation. *Gene* 357: 1–8.
30. **Zhang J, Li L** (2005) BMP signaling and stem cell regulation. *Dev Biol* 284: 1–11.
31. **Chen G, Deng C, Li Y-P, Chen G, Deng C, et al.** (2012) TGF-beta and BMP signaling in osteoblast differentiation and bone formation. *Int J Biol Sci* 8: 272.
32. **Huang JS, Huang SS, Deuel TF** (1983) Human platelet-derived growth factor: radioimmunoassay and discovery of a specific plasma-binding protein. *J Cell Biol* 97: 383–388.
33. **Czarkowska-Paczek B, Bartłomiejczyk I, Przybylski J** (2006) The serum levels of growth factors: PDGF, TGF-beta and VEGF are increased after strenuous physical exercise. *J Physiol Pharmacol* 57: 189–197.
34. **Yu PB, Hong CC, Sachidanandan C, Babitt JL, Deng DY, et al.** (2008) Dorsomorphin inhibits BMP signals required for embryogenesis and iron metabolism. *Nat Chem Biol* 4: 33–41.
35. **Ma G, Li L, Hu Y, Chau JFL, Au BJ, et al.** (2012) Atypical Atm-p53 genetic interaction in osteogenesis is mediated by Smad1 signaling. *J Mol Cell Biol* 4: 118–120.
36. **Hock JM, Canalis E** (1994) Platelet-derived growth factor enhances bone cell replication, but not differentiated function of osteoblasts. *Endocrinology* 134: 1423–1428.
37. **Inai K, Norris RA, Hoffman S, Markwald RR, Sugi Y** (2008) BMP-2 induces cell migration and periostin expression during atrioventricular valvulogenesis. *Dev Biol* 315: 383–396.
38. **Darby S, Cross SS, Brown NJ, Hamdy FC, Robson CN** (2008) BMP-6 over-expression in prostate cancer is associated with increased Id-1 protein and a more invasive phenotype. *J Pathol* 214: 394–404.
39. **Sanchez-Fernandez MA, Gallois A, Riedl T, Jurdic P, Hoflack B** (2008) Osteoclasts control osteoblast chemotaxis via PDGF-BB/PDGF receptor beta signaling. *PLoS One* 3: e3537.
40. **Malabanan KP, Sheahan AV, Khachigian LM** (2012) Platelet-derived growth factor-BB mediates cell migration through induction of activating transcription factor 4 and tenascin-C. *Am J Pathol* 180: 2590–2597.
41. **Pickett EA, Olsen GS, Tallquist MD** (2008) Disruption of PDGFRalpha-initiated PI3K activation and migration of somite derivatives leads to spina bifida. *Development* 135: 589–598.
42. **Bordei P** (2011) Locally applied platelet-derived growth factor accelerates fracture healing. *J Bone Joint Surg Br* 93: 1653–1659.
43. **Chaudhary LR, Hofmeister AM, Hruska KA** (2004) Differential growth factor control of bone formation through osteoprogenitor differentiation. *Bone* 34: 402–411.
44. **Barrientos S, Stojadinovic O, Golinko MS, Brem H, Tomic-Canic M** (2008) Growth factors and cytokines in wound healing. *Wound Repair Regen* 16: 585–601.
45. **Chen PH, Chen X, He X** (2013) Platelet-derived growth factors and their receptors: structural and functional perspectives. *Biochim Biophys Acta* 1834: 2176–2186.
46. **Leveen P, Pekny M, Gebre-Medhin S, Swolin B, Larsson E, et al.** (1994) Mice deficient for PDGF B show renal, cardiovascular, and hematological abnormalities. *Genes Dev* 8: 1875–1887.
47. **Kubota K, Sakikawa C, Katsumata M, Nakamura T, Wakabayashi K** (2002) Platelet-derived growth factor BB secreted from osteoclasts acts as an osteoblastogenesis inhibitory factor. *J Bone Miner Res* 17: 257–265.

48. **Rydziel S, Shaikh S, Canalis E** (1994) Platelet-derived growth factor-AA and -BB (PDGF-AA and -BB) enhance the synthesis of PDGF-AA in bone cell cultures. *Endocrinology* 134: 2541–2546.
49. **Centrella M, McCarthy TL, Kusmik WF, Canalis E** (1992) Isoform-specific regulation of platelet-derived growth factor activity and binding in osteoblast-enriched cultures from fetal rat bone. *J Clin Invest* 89: 1076–1084.
50. **Caplan AI, Correa D** (2011) PDGF in bone formation and regeneration: new insights into a novel mechanism involving MSCs. *J Orthop Res* 29: 1795–1803.
51. **Massague J** (2003) Integration of Smad and MAPK pathways: a link and a linker revisited. *Genes Dev* 17: 2993–2997.
52. **Pera EM, Ikeda A, Eivers E, De Robertis EM** (2003) Integration of IGF, FGF, and anti-BMP signals via Smad1 phosphorylation in neural induction. *Genes Dev* 17: 3023–3028.
53. **Chau JFL, Jia D, Wang Z, Liu Z, Hu Y, et al.** (2012) A crucial role for bone morphogenetic protein-Smad1 signalling in the DNA damage response. *Nat Commun* 3: 836.
54. **Fuentealba LC, Eivers E, Ikeda A, Hurtado C, Kuroda H, et al.** (2007) Integrating patterning signals: Wnt/GSK3 regulates the duration of the BMP/Smad1 signal. *Cell* 131: 980–993.
55. **Verheyen EM** (2007) Opposing effects of Wnt and MAPK on BMP/Smad signal duration. *Dev Cell* 13: 755–756.
56. **Eivers E, Demagny H, De Robertis EM** (2009) Integration of BMP and Wnt signaling via vertebrate Smad1/5/8 and *Drosophila* Mad. *Cytokine Growth Factor Rev* 20: 357–365.
57. **Sieber C, Kopf J, Hiepen C, Knaus P** (2009) Recent advances in BMP receptor signaling. *Cytokine Growth Factor Rev* 20: 343–355.
58. **Karlsson L, Lindahl P, Heath JK, Betsholtz C** (2000) Abnormal gastrointestinal development in PDGF-A and PDGFR-(alpha) deficient mice implicates a novel mesenchymal structure with putative instructive properties in villus morphogenesis. *Development* 127: 3457–3466.
